# Supplementary material
Source: Springer Nature journal article supplement (https://www.springermedizin.de/resource/supplementary/12936_2012_2219_MOESM7_ESM.pdf/9542838)

**A**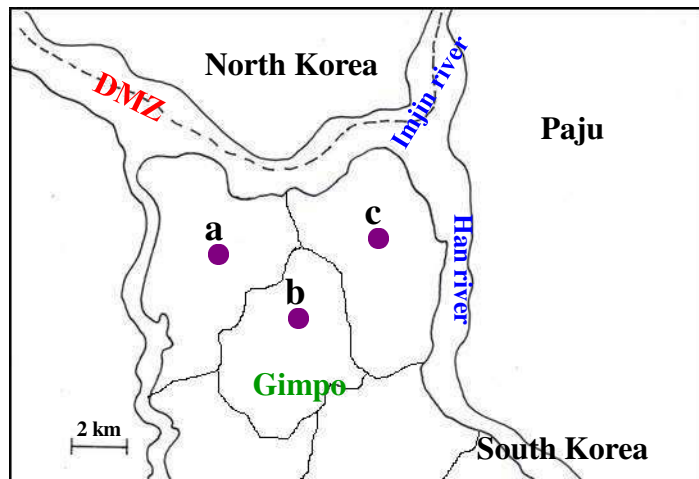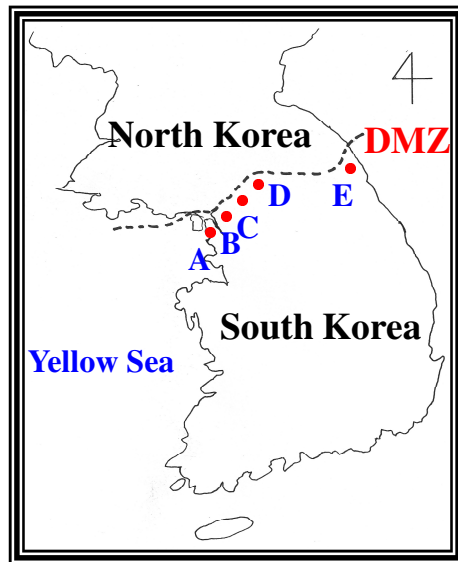**E**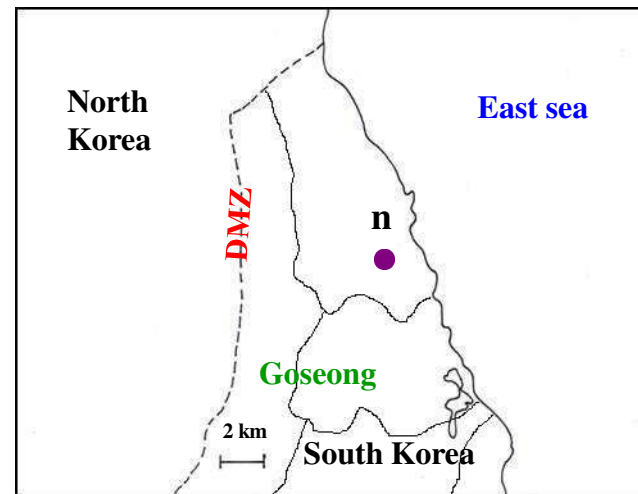**B**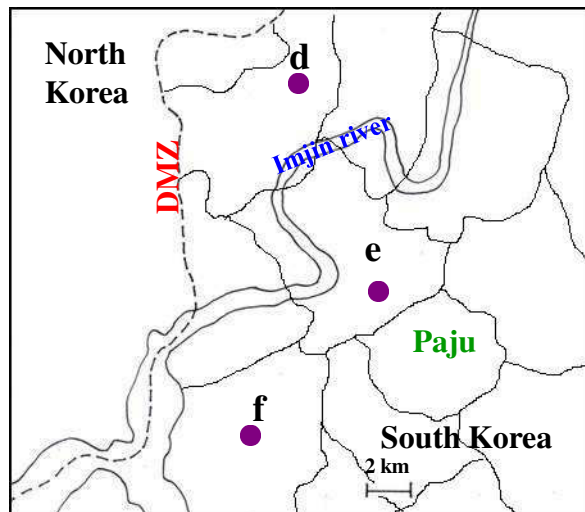**C**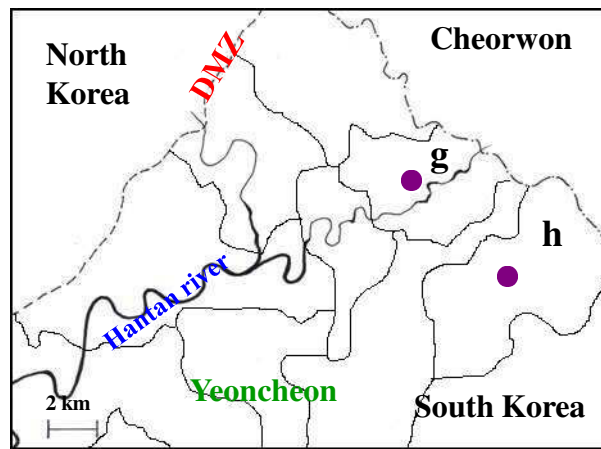**D**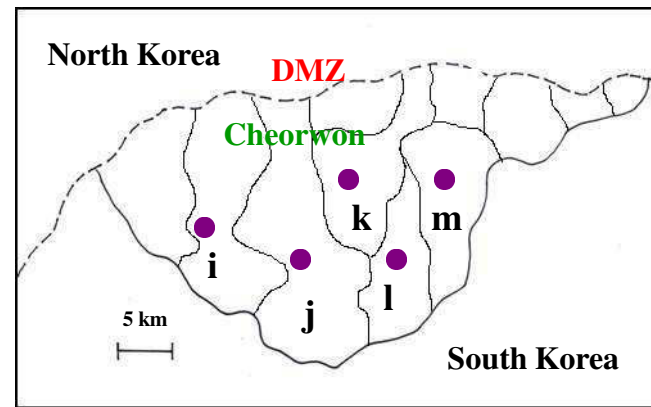

Supplement: MOESM7 [file 9542838]
